# Supplementary material
Source: PubMed Central journal article supplement (PMC6552429)
Supplement: supp_RA119.007420_142956_1_supp_314957_pq1djt.pdf [file supp_RA119.007420_142956_1_supp_314957_pq1djt.pdf]

## Phosphorylation of HSP90 by protein kinase A is essential for the nuclear translocation of androgen receptor

Manisha Dagar<sup>1</sup>, Julie Pratibha Singh<sup>1</sup>, Gunjan Dagar<sup>1</sup>, Rakesh K Tyagi<sup>2</sup>, Gargi Bagchi Bhattacharjee<sup>1</sup>

From the <sup>1</sup>Amity Institute of Biotechnology, Amity University Haryana, Manesar, Gurugram, 122413;

<sup>2</sup>Special Centre for Molecular Medicine, Jawaharlal Nehru University, New Delhi, 110067

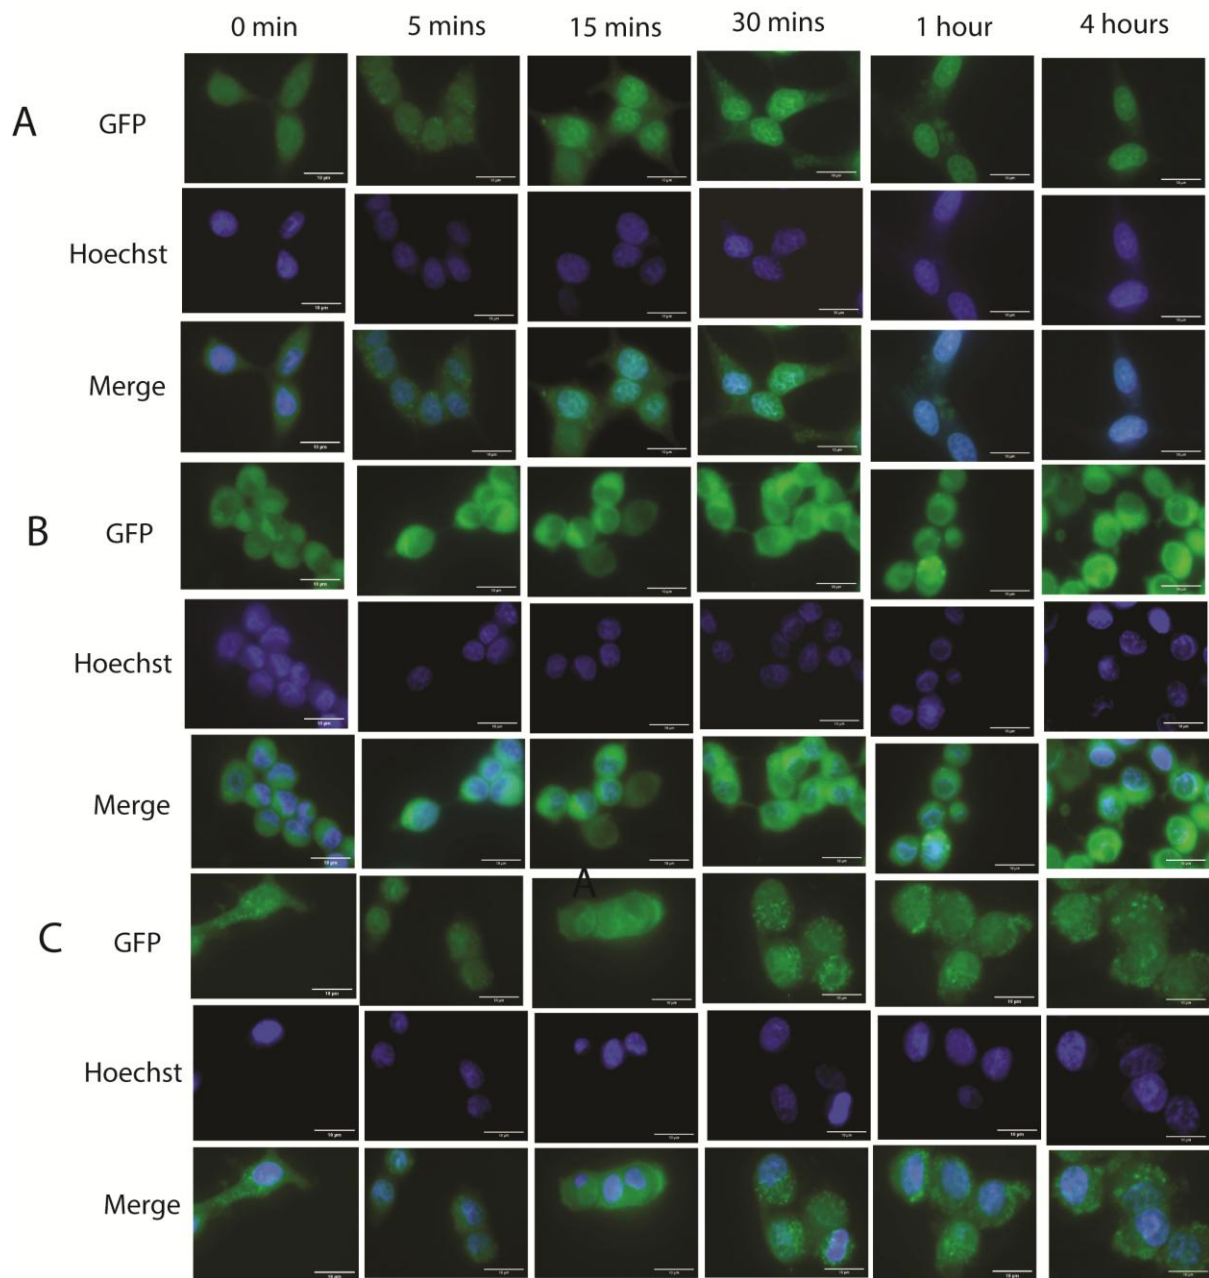

Figure S1

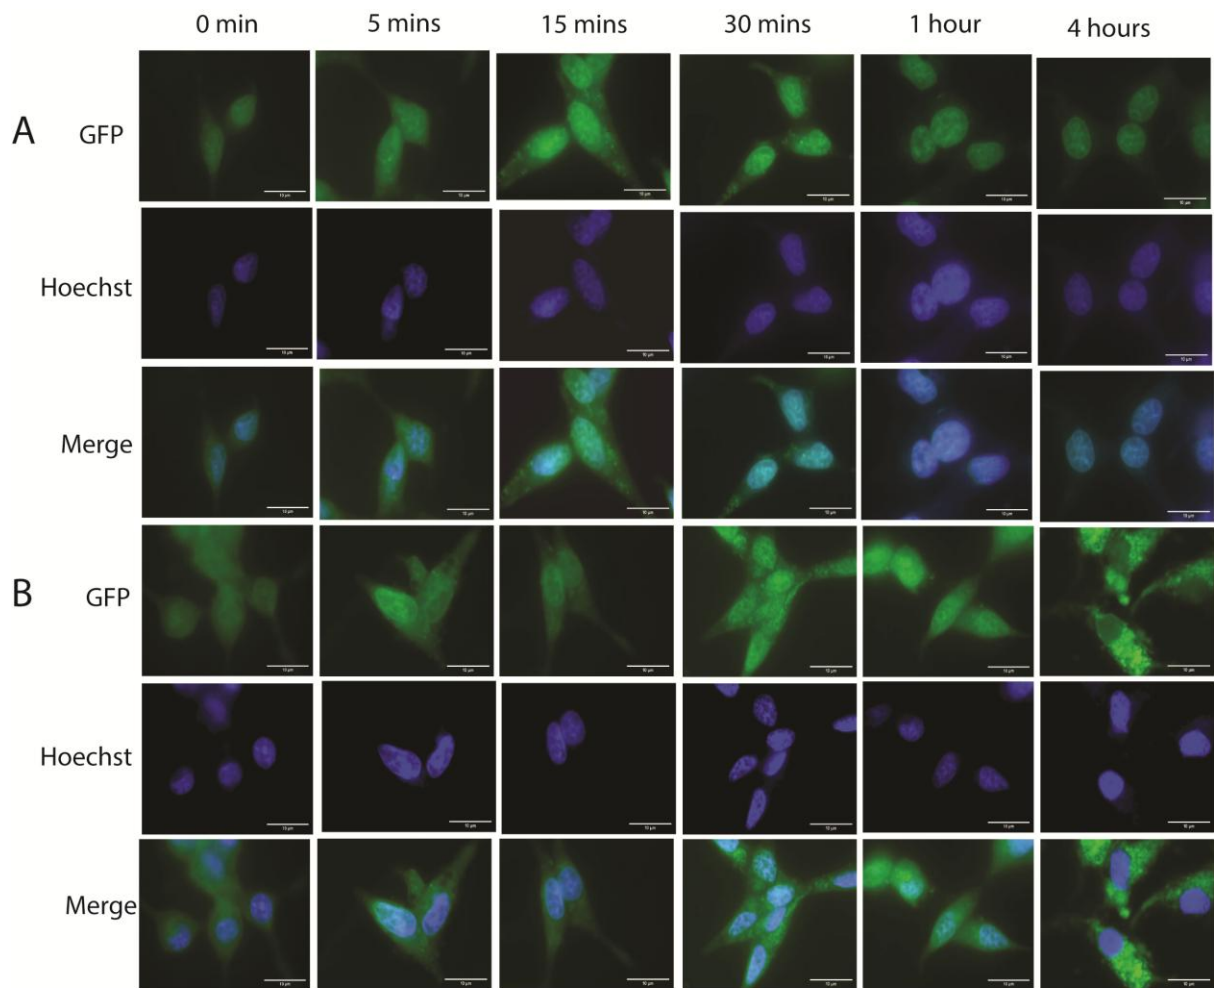

Figure S2

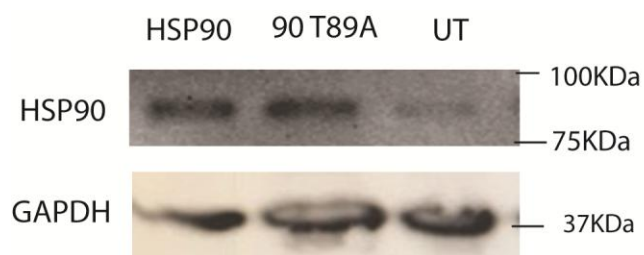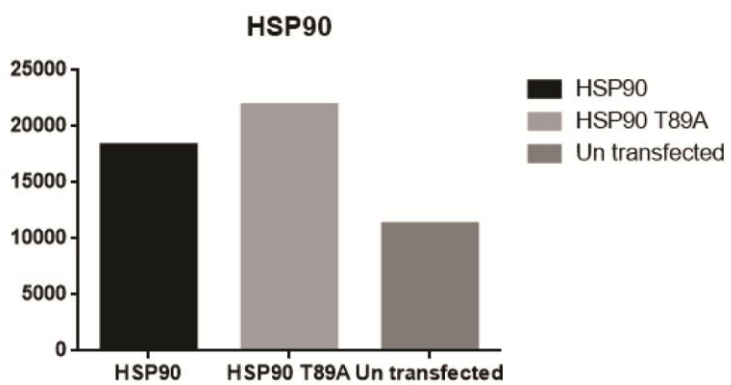

Figure S3

## Figure Legends

**Figure S1. Inhibition of AR translocation using PKA Inhibitor, H89 and by PKA-specific siRNA (SiPKA) in LNCaP cells.** LNCaP cells were transfected using GFP-AR in presence or absence of siPKA (120nM). Transfected cells were treated or not treated with H89 (30uM) for 40 mins prior to treatment with testosterone (10nM). **A.** Images at different time intervals (0, 5, 15, 30mins, 1 and 4 hours) after treatment with Testosterone. **B.** Images after treatment with testosterone in the presence of H89. **C.** Images of siPKA transfected cells after treatment with Testosterone. Scale bar, 10µm (added using Image J). Results for two of these time points, namely, 0 and 60 mins have been highlighted in Figure 2, to demonstrate that migration of AR into the nucleus is almost complete by 60 mins post- testosterone treatment, and is inhibited if PKA activation is inhibited by H89 or siPKA.

**Figure S2. Inhibition of AR translocation in HSP90 T89A transfected LNCaP cells.** LNCaP cells were transfected using GFP-AR alone or in combination with HSP90 T89A mutant. Transfected cells were treated with testosterone (10nM) and images were captured. **A.** Images at different time intervals (0, 5, 15, 30mins, 1 and 4 hours) after treatment with Testosterone (10nM). **B.** Images after treatment with Testosterone in HSP90 T89A transfected cells. Scale bar, 10µm (added using Image J). Results for two of these time points, namely, 0 and 60 mins have been highlighted in Figure 5, to demonstrate that migration of AR in to the nucleus is almost complete by 60 mins post- testosterone treatment and is inhibited in HSP90 T89A expressing cells.

**Figure S3. A. Anti-HSP90 antibody detects both HSP90 and HSP90 T89A mutant proteins.** LNCaP cells were transfected using HSP90/ HSP90 T89A or vector alone. Western blot was performed using HSP90 antibody. GAPDH was used as loading control.
